# Supplementary material for: Calix[4]arene-supported trigonal and square prisms of Mn and Na
Source: Royal Society of Chemistry journal article supplement (doi:10.1039/d5ce00285k), 2025-01-01
Supplement: d5ce00285k1.pdf [file d5ce00285k1.pdf]

SI

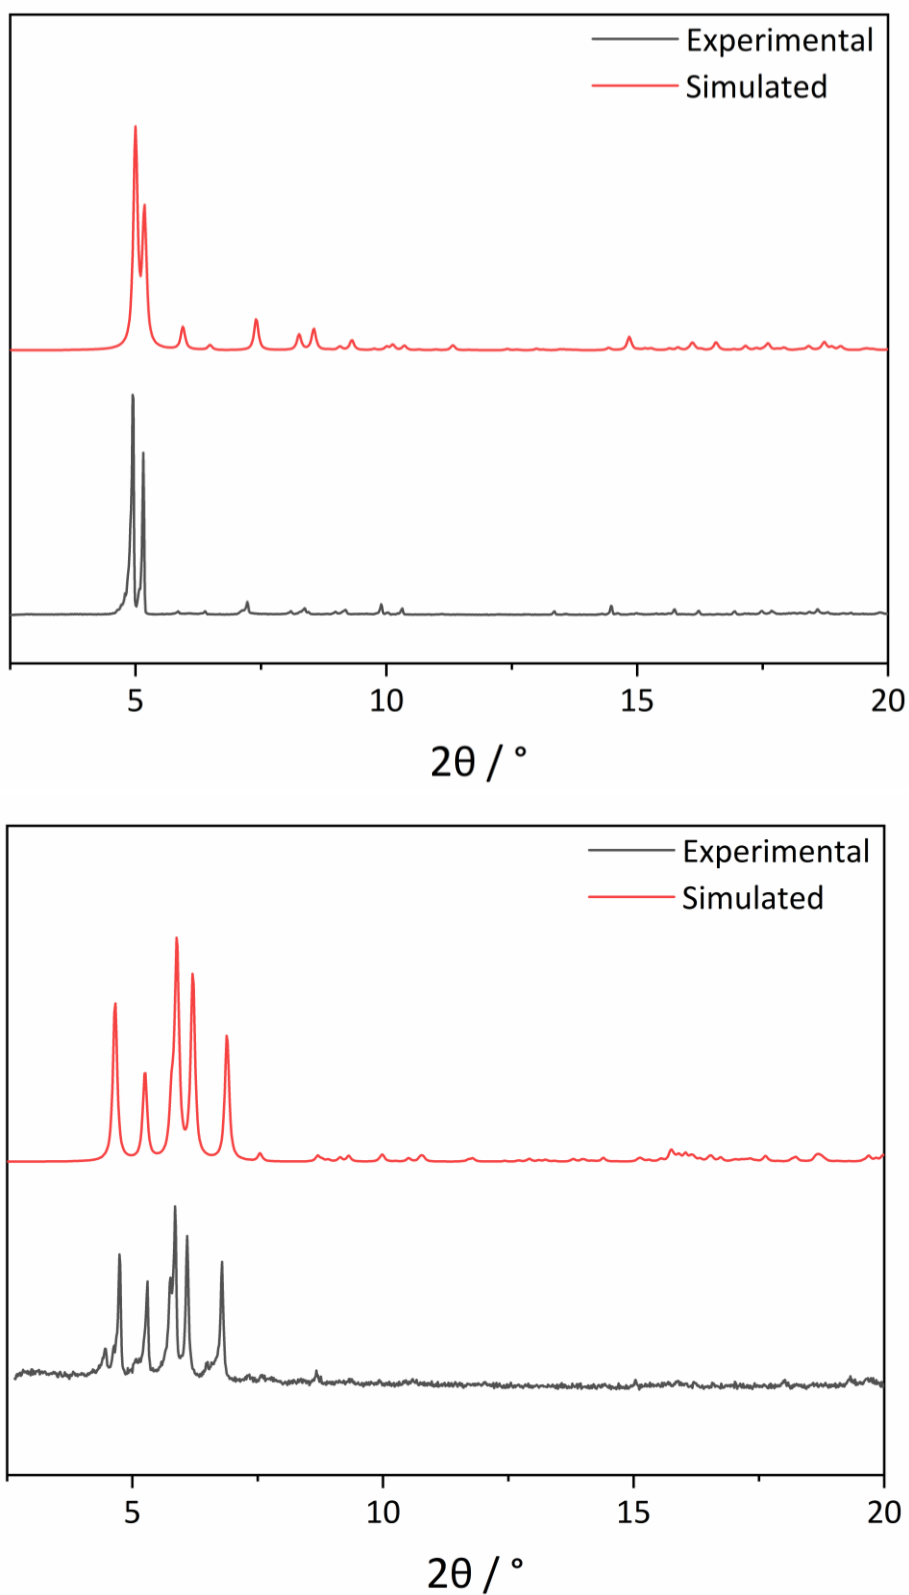

**Figure S1.** PXRD data for **1** (top) and **2** (bottom).

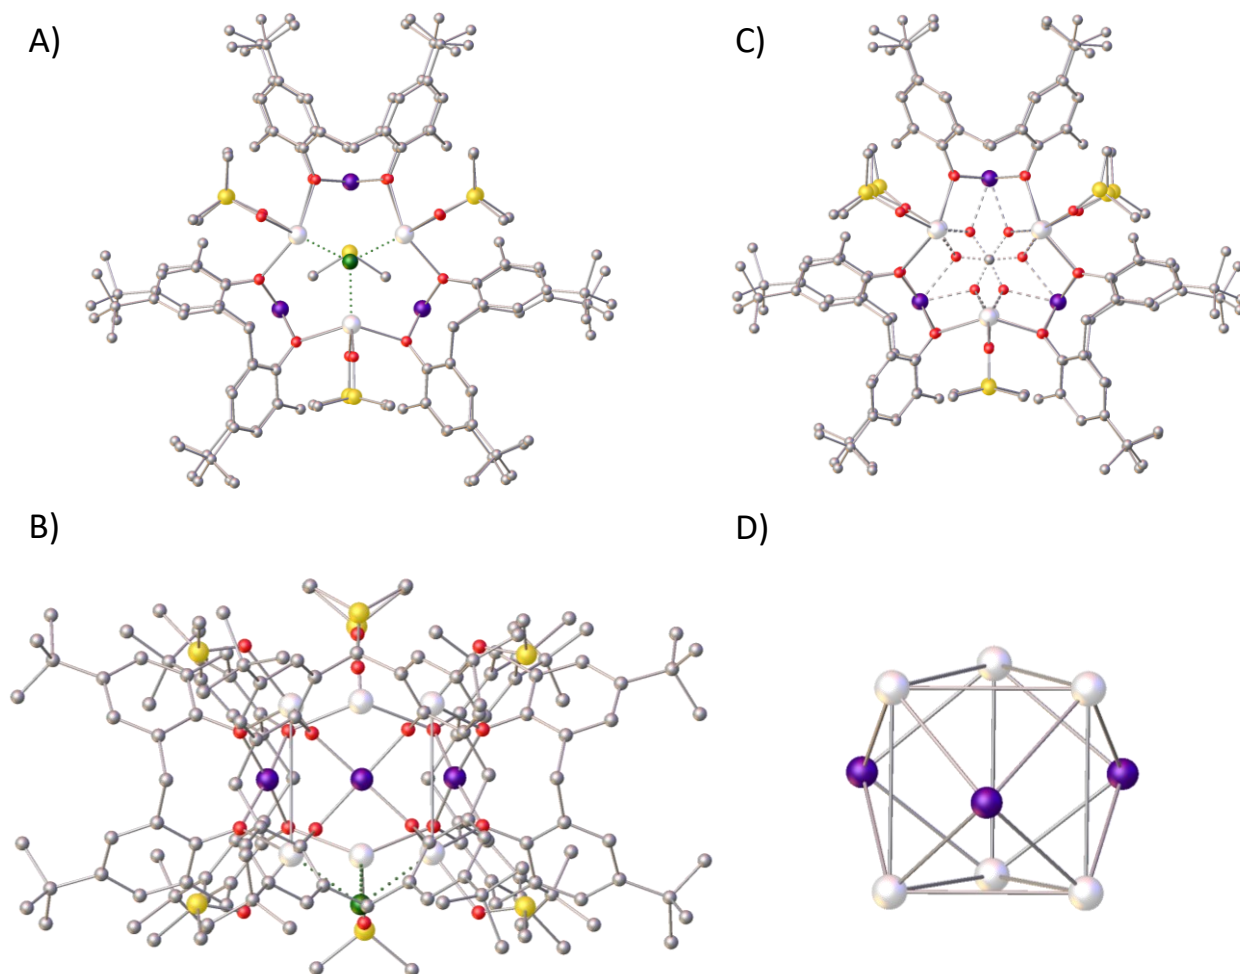

**Figure S2.** A) The molecular structure of complex **1** viewed down the *c*-axis of the cell. H atoms, solvent molecules and the disordered carbonate ion are omitted for clarity. B) The molecular structure of complex **1** viewed down the *b*-axis of the cell. H atoms, solvent molecules and the disordered carbonate ion are omitted for clarity. C) The molecular structure of complex **1** viewed down the *c*-axis of the cell, with the disordered carbonate ion included and the capping dmsu, Cl ion, H atoms and solvent molecules removed. D) Metallic skeleton of **1** highlighting the tricapped trigonal prism. Colour code: Mn<sup>III</sup> = dark purple, Na = white, O = red, C = grey, S = yellow, Cl = green.

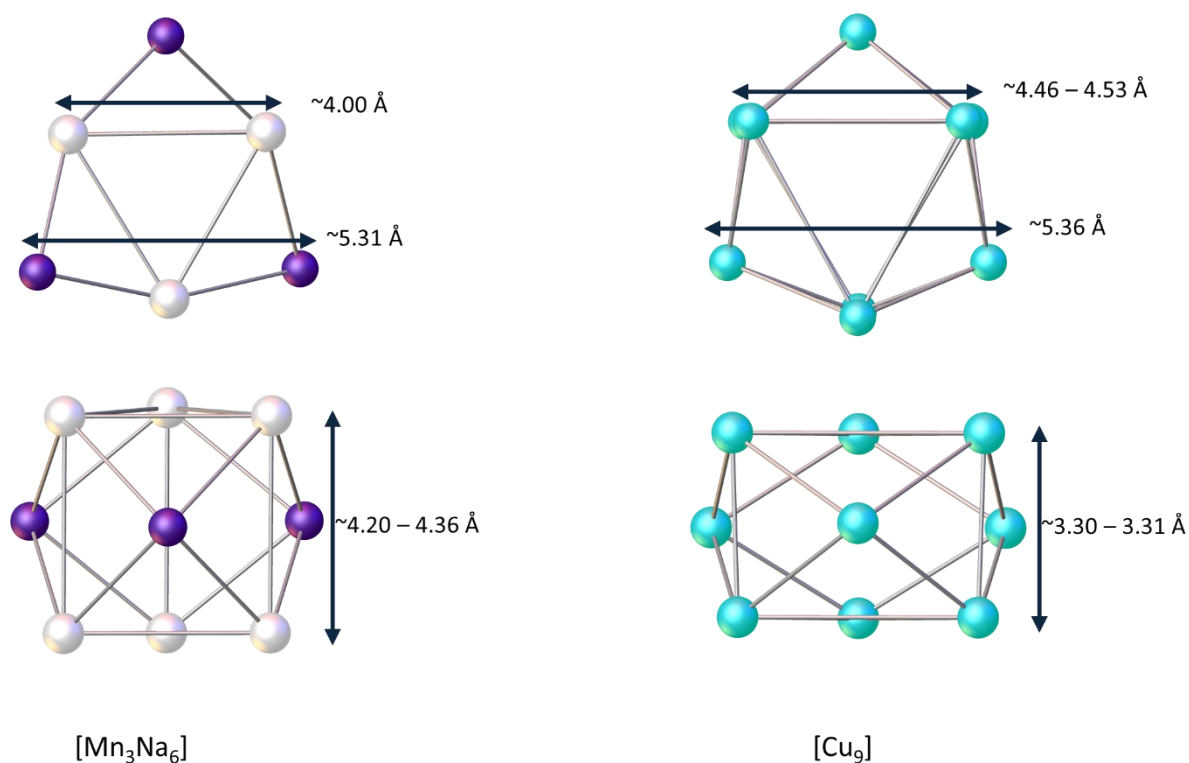

**Figure S3.** Comparison of the metallic skeleton of **1** (left) with  $[\text{Cu}_9]$  (right). Colour code:  $\text{Mn}^{\text{III}}$  = dark purple, Na = white,  $\text{Cu}^{\text{II}}$  = turquoise. Figures not to scale.

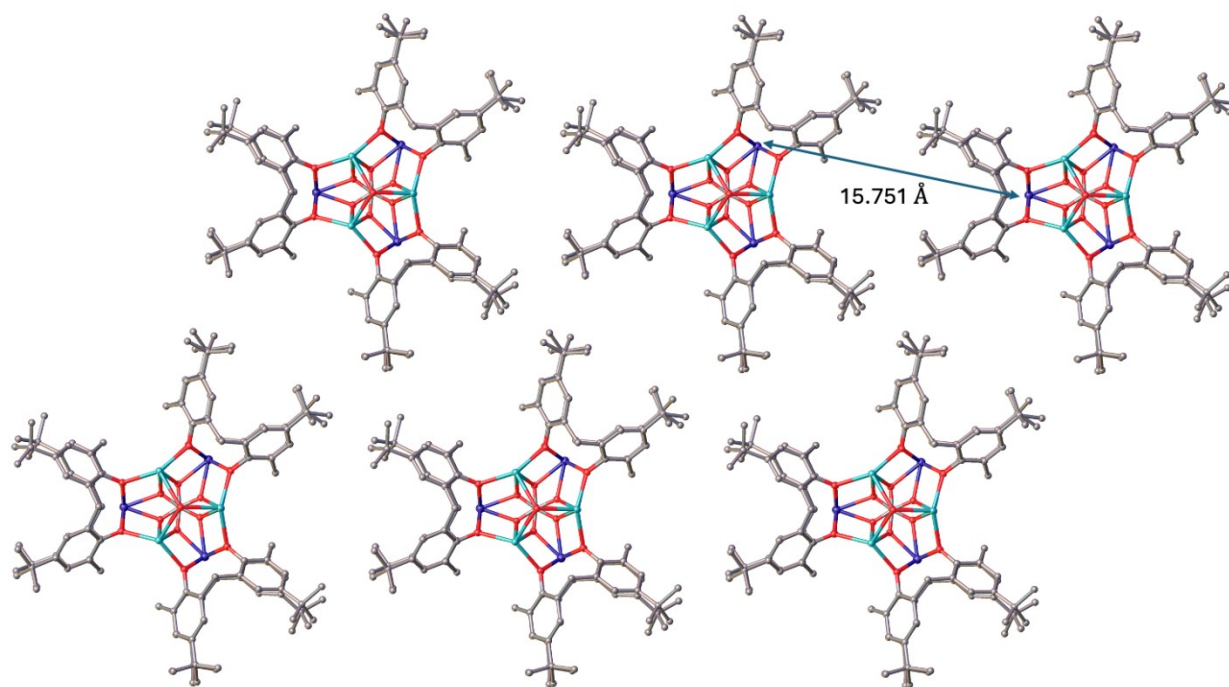

**Figure S4.** View of the *ab* plane in the extended structure of **1** with closest inter-cluster Mn...Mn distance highlighted. Ligated solvent molecules, Cl anions, H atoms and MeCN of crystallisation have been omitted for clarity. Disordered <sup>t</sup>Bu groups are shown in just one position.

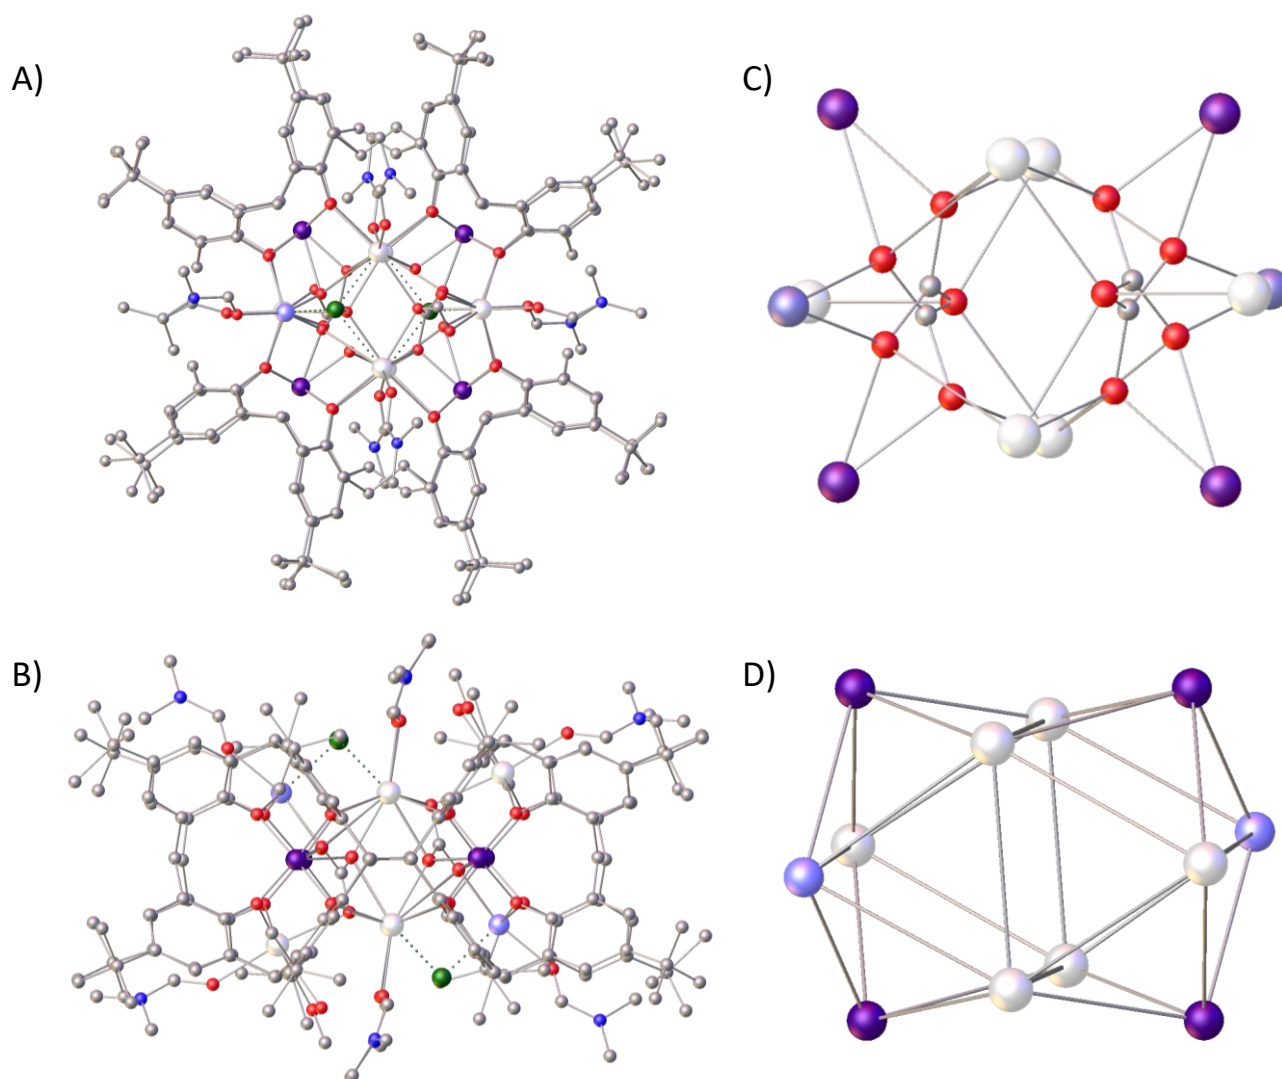

**Figure S5.** A)-B) Orthogonal views of the structure of **2**. C) View of the bonding of the disordered carbonate ions in **2**. D) Metallic skeleton of **2**. Colour code:  $\text{Mn}^{\text{III}}$  = dark purple,  $\text{Mn}^{\text{II}}$  = light purple, Na = white, O = red, C = grey, N = blue, Cl = green.

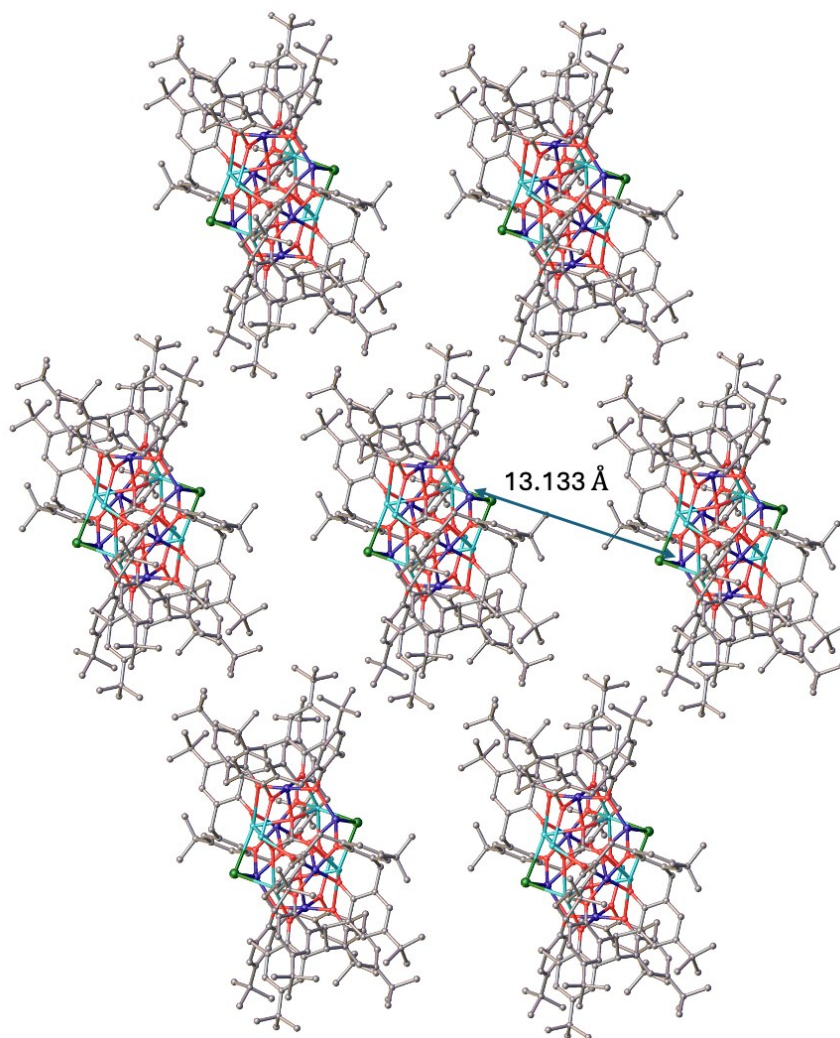

**Figure S6.** View along the *b* axis showing layers in the *ab* plane in the extended structure of **2** with closest inter-cluster Mn···Mn distance highlighted. Ligated solvent, H atoms and co-crystallised solvent molecules have been omitted for clarity. Disorder related to <sup>t</sup>Bu, methylene bridging, and carbonate anions in the cluster core is shown in only one position.

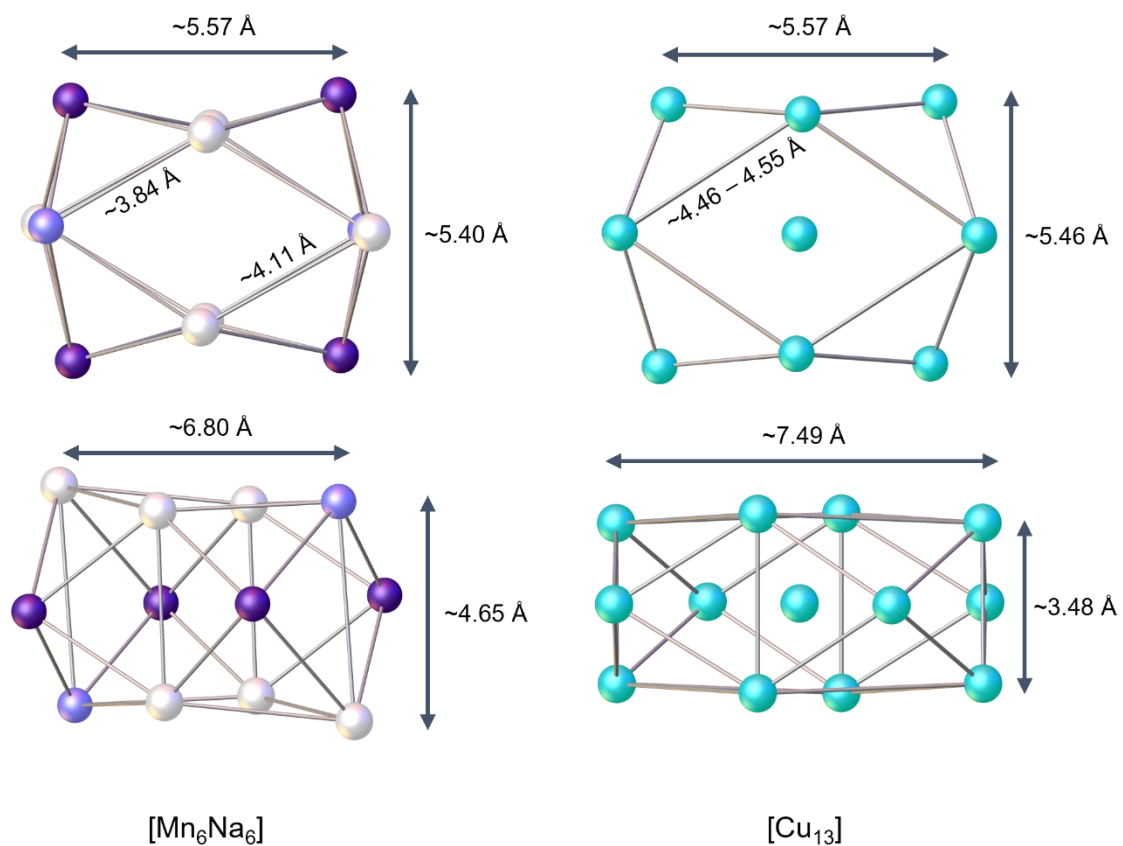

**Figure S7.** Comparison of the metallic skeletons of **2** (left) and [Cu<sub>13</sub>] (right). Colour code: Mn<sup>III</sup> = dark purple, Mn<sup>II</sup> = pale purple, Na = white, Cu<sup>II</sup> = turquoise.

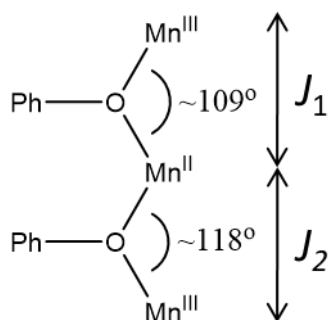

**Figure S8.** Model of the magnetic exchange interaction scheme used to simultaneously fit the susceptibility and magnetisation data for compound **2**.
